# Supplementary material
Source: publisher figshare collection journal article supplement (https://gsajournals.figshare.com/ndownloader/files/21195210)
Supplement: Supplementary file 1 [file 21195210]

**Table S1. Predicted genotypes of two different inheritance models**

| Inheritance model | Male sterile plant (NH80-A) | Restorer line (TA95) | Maintainer line (WH606) |
| --- | --- | --- | --- |
| 1 gene with multiple allele | *BrMsbMsb* | *BrMsaMsa* | *BrMscMsc* |
|  | *BrMsbMsc* |  |  |
| 2 dominant gene | *BrMsMs rfrf* | *BrMsMs RfRf* | *Brmsms rfrf* |
|  | *BrMsms rfrf* | *BrMsms RfRf* |  |
|  |  | *Brmsms RfRf* |  |
